# Supplementary material for: Cerebral organoids transplantation repairs infarcted cortex and restores impaired function after stroke
Source: PubMed Central journal article supplement (PMC10229586; doi:10.1038/s41536-023-00301-7), 2023-05-30
Supplement: 41536_2023_301_MOESM1_ESM.pdf [file 41536_2023_301_MOESM1_ESM.pdf]

# Supplementary Information

## Cerebral organoids transplantation repairs infarcted cortex and restores impaired function after stroke

Shi-Ying Cao<sup>1,3</sup>, Di Yang<sup>1</sup>, Zhen-Quan Huang<sup>1</sup>, Yu-Hui Lin<sup>1</sup>, Hai-Yin Wu<sup>1</sup>, Lei Chang<sup>1</sup>,  
Chun-Xia Luo<sup>1</sup>, Yun Xu<sup>3</sup>, Yan Liu<sup>2\*</sup>, Dong-Ya Zhu<sup>1,2\*</sup>

<sup>1</sup>Department of Pharmacology, School of Pharmacy, Nanjing Medical University,  
Nanjing, 211166, China

<sup>2</sup>Institution of Stem Cells and Neuroregeneration, Nanjing Medical University, Nanjing,  
211166, China

<sup>3</sup>Department of Neurology, Affiliated Drum Tower Hospital of Nanjing University,  
Medical School, Nanjing 210008, China

Dong-Ya Zhu: [dyzhu@njmu.edu.cn](mailto:dyzhu@njmu.edu.cn)

\*Corresponding authors: [dyzhu@njmu.edu.cn](mailto:dyzhu@njmu.edu.cn) or [yanliu@njmu.edu.cn](mailto:yanliu@njmu.edu.cn)

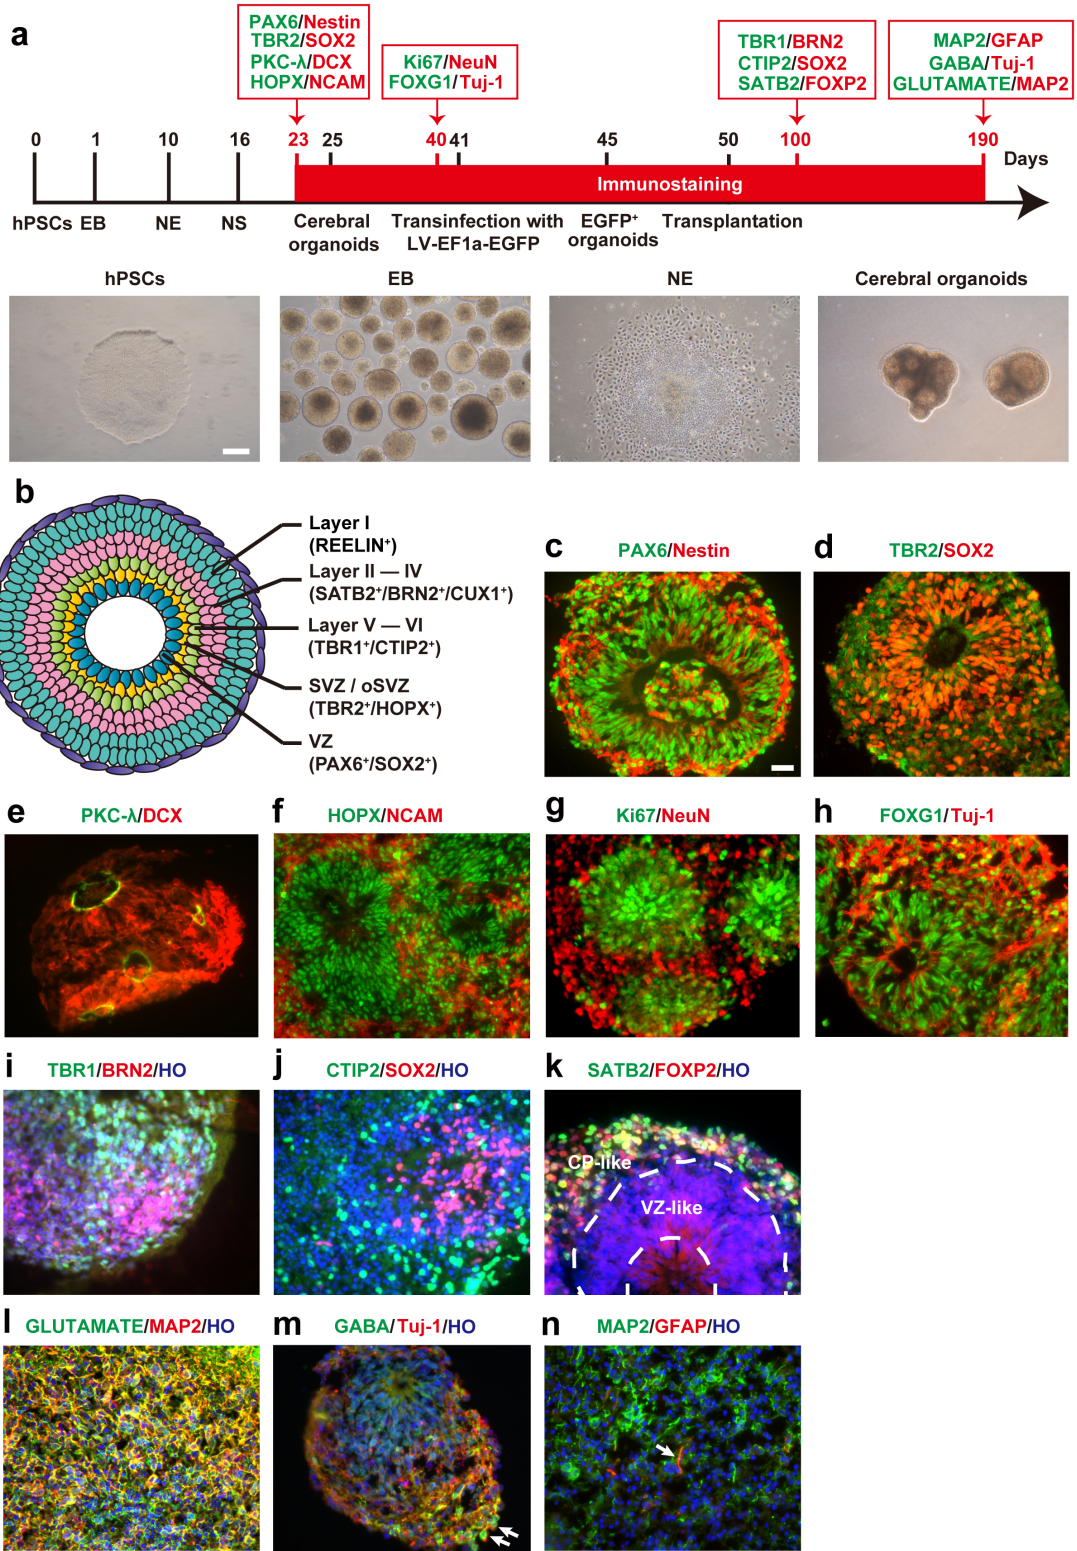

**Supplementary Figure 1. Generation of human cerebral organoids *in vitro*.**

(a) Schematic showing the differentiation, timeline of immunostaining, transduction with LV and transplantation of hPSCs-derived human cerebral organoids, example images of each stage were shown. Scale bar, 250  $\mu\text{m}$ . (b) Schematic illustrating the laminar organization and cellular composition of human cerebral organoids. (c-f) Representative images showing cerebral organoids stained with the dorsal forebrain progenitor marker PAX6 and neural stem cells marker Nestin (c), VZ marker SOX2 and intermediate progenitor marker TBR2 (d), the apical marker protein kinase C- $\lambda$  (PKC- $\lambda$ ) and immature neurons marker doublecortin (DCX) (e), and oRGs marker HOPX and neural cell adhesion molecule marker NCAM (f) on d 23 after differentiation. (g and h) Representative images showing cerebral organoids stained with mature neuron marker NeuN and proliferation marker Ki67 (g), forebrain marker FOXP1 and neuron marker Tuj-1 (h) on d 40 after differentiation. (i-k) Representative images showing cerebral organoids stained with deep-layer markers TBR1, FOXP2, and CTIP2, and up-layer markers BRN2 and SATB2 on d 100 after differentiation. (l-n) On d 190 after differentiation, cerebral organoids were mainly composed of glutamatergic neurons (Glutamate/MAP2), with only a few GABAergic neurons (GABA) and astrocytes (GFAP). Scale bar, c-n, 25  $\mu\text{m}$ .

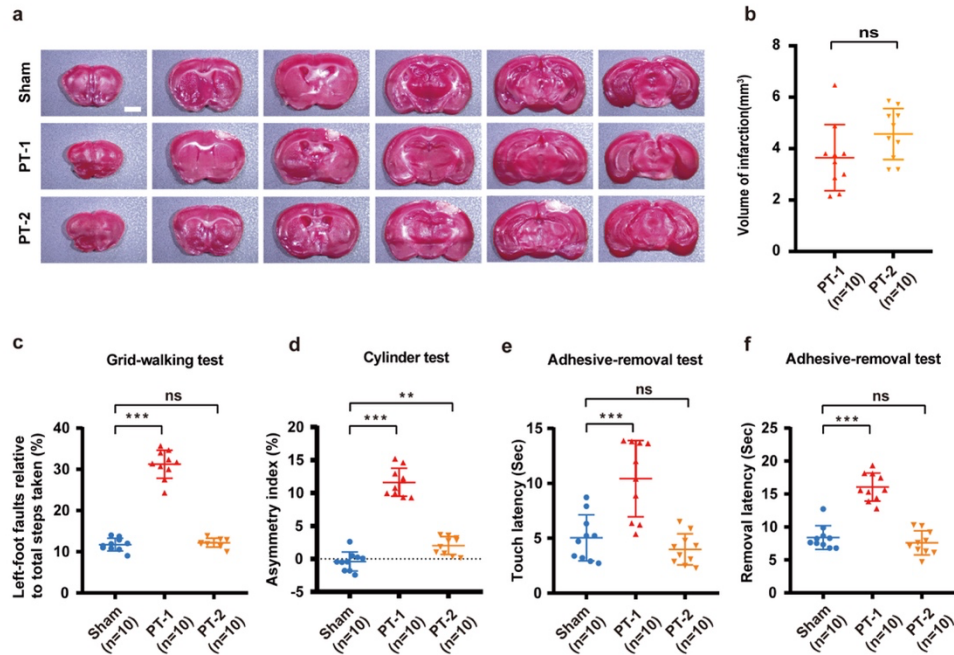

**Supplementary Figure 2. Behavioral modifications after photothrombotic stroke in the forelimb motor cortex or parietal cortex.**

(a) Representative of TTC–stained slices. Scale bar, 2  $\mu$ m. (b) Infarct volume of mice subjected to photothrombotic stroke in the forelimb motor cortex or parietal cortex (*t*-test,  $P = 0.089$ ). (c) Left-foot faults relative to total steps taken in the grid-walking test (One-way ANOVA,  $F_{2,27} = 246.3$ ,  $***P < 0.001$ ). (d) Asymmetry index of forelimbs in the cylinder test (One-way ANOVA,  $F_{2,27} = 144.3$ ,  $**P = 0.009$ ,  $***P < 0.001$ ). (e) Touch latency (One-way ANOVA,  $F_{2,27} = 19.35$ ,  $***P < 0.001$ ) in the adhesive-removal test. (f) Remove latency (One-way ANOVA,  $F_{2,27} = 59.49$ ,  $***P < 0.001$ ) in the adhesive-removal test.  $n = 10$  animals for each group. In b-f, data were presented as mean  $\pm$  standard deviation.

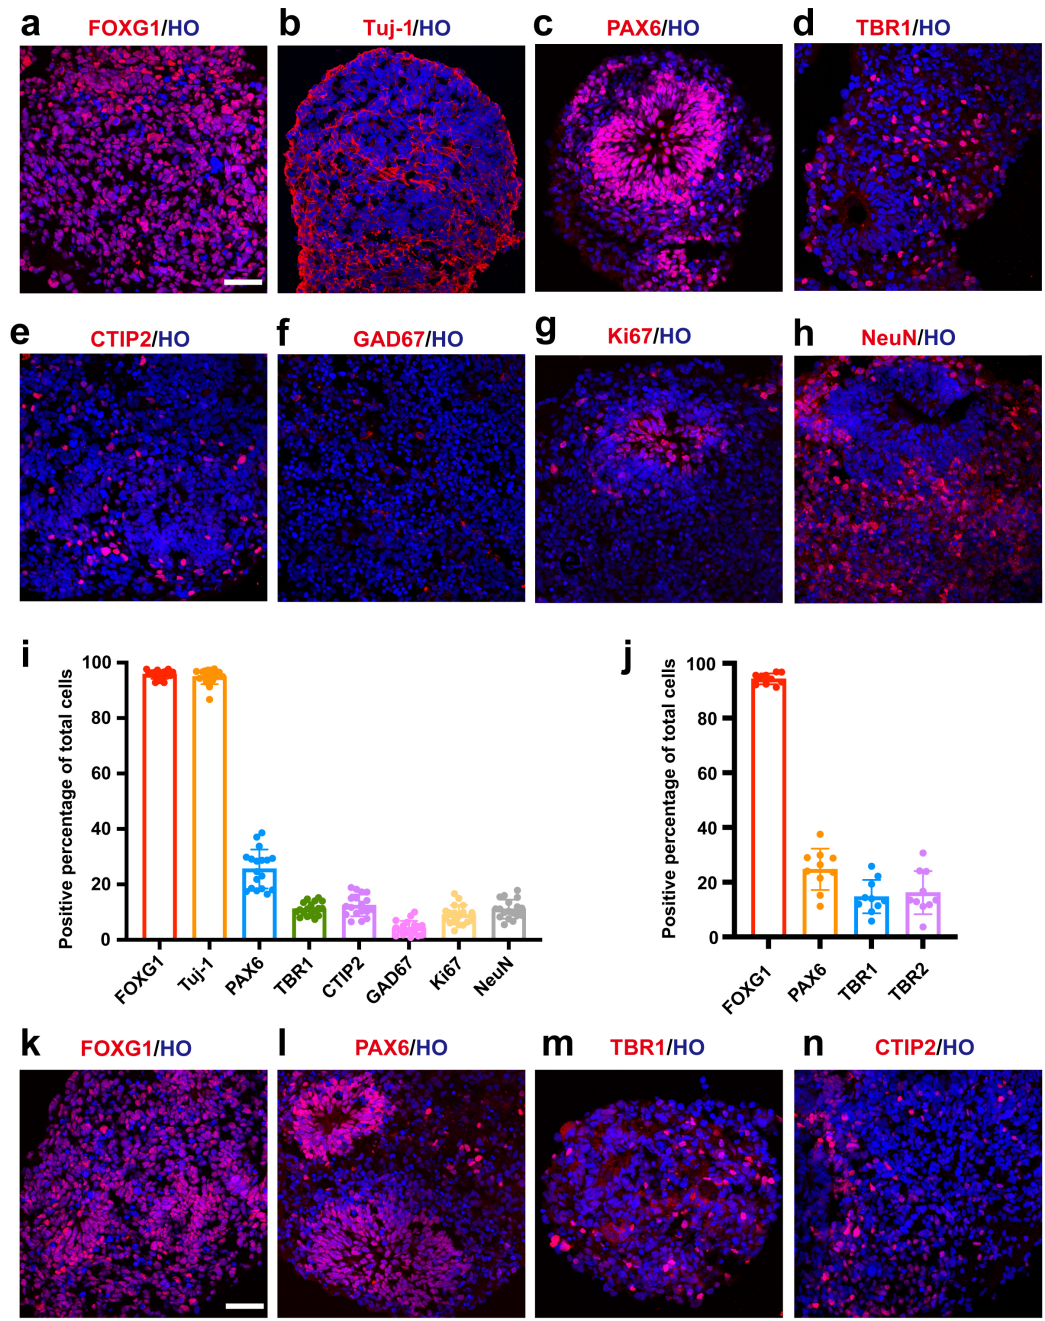

**Supplementary Figure 3. The cell composition of cortical organoids differentiated for 50 days in vitro.**

(a-h) Representative images showing cerebral organoids derived from hESCs stained with the forebrain marker FOXP2(a), neuron marker Tuj-1(b), dorsal forebrain

progenitor marker PAX6 **(c)**, deep-layer (V-VI) cortical marker TBR1**(d)** and CTIP2 **(e)**, GABAergic neuron marker GAD67 **(f)**, cell proliferation marker Ki67 **(g)** and mature neuron marker NeuN **(h)** on 50 d after differentiation *in vitro*. Scale bar, **a-h**, 50  $\mu\text{m}$ . **(i)** Bar graph showing the proportion of FOXG1-, Tuj-1-, PAX6-, TBR1-, CTIP2-, GAD67-, Ki67-, and NeuN-positive cells on 50 d after differentiation.  $n=18$  organoids. More than 10,000 cells from random fields were manually counted in each condition. **(j)** Bar graph showing the proportion of FOXG1-, PAX6-, TBR1-, CTIP2-, cells derived from IMR-90-4 on 50 d after differentiation.  $n=10$  organoids. More than 5,000 cells from random fields were manually counted in each condition. **(k-n)** Representative images showing cerebral organoids derived from IMR-90-4 stained with the forebrain marker FOXG1**(k)**, dorsal forebrain progenitor marker PAX6 **(l)**, deep-layer (V-VI) cortical marker TBR1 **(m)** and CTIP2 **(n)** on 50 d after differentiation.  $n=10$  organoids. More than 5,000 cells from random fields were manually counted in each condition. Scale bar, **k-n**, 50  $\mu\text{m}$ . In **i** and **j**, data were presented as mean  $\pm$  standard deviation.

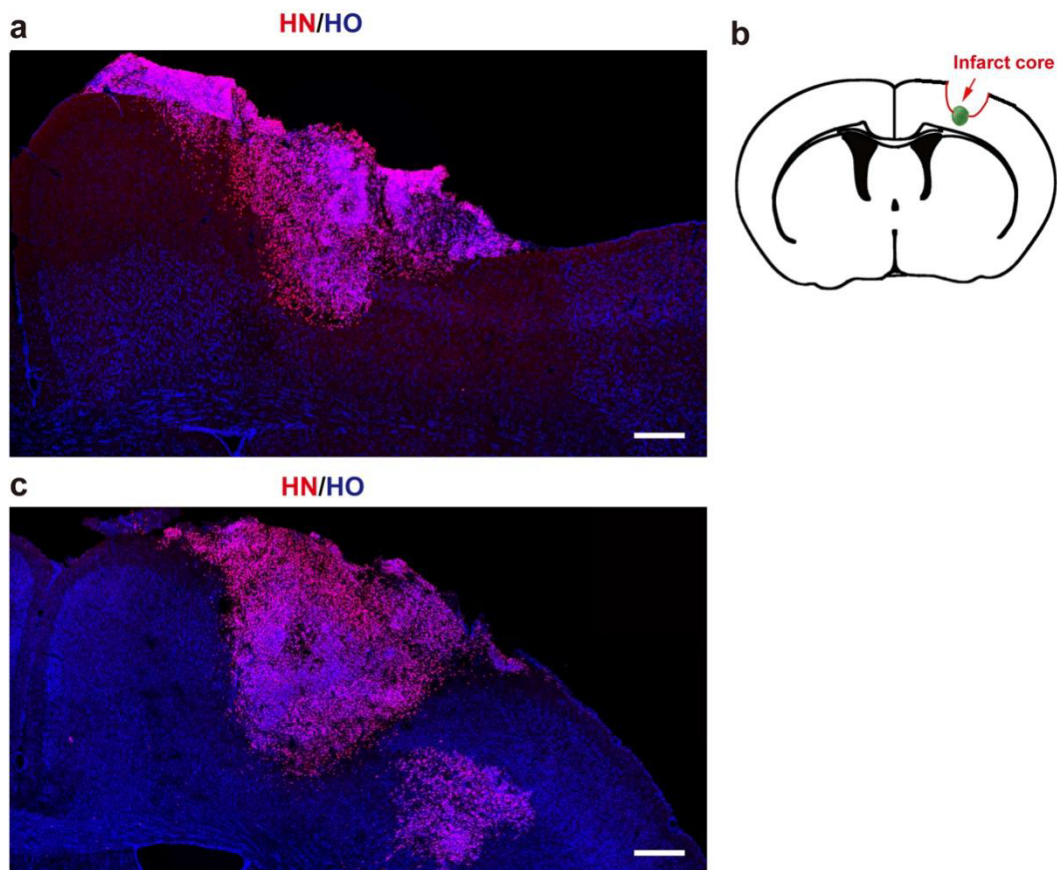

**Supplementary Figure 4. Immunostaining showing the repair of infarcted cavity on 60 d after transplantation of one or three organoids.**

**(a)** Representative images showing the repair of infarcted cavity on d 60 after transplantation of one organoid. Scale bar, 10  $\mu\text{m}$ . **(b)** Diagram showing the site of one organoid transplant. **(c)** Representative images showing the repair of infarcted cavity on d 60 after transplantation of three organoids. Scale bar, 10  $\mu\text{m}$ .

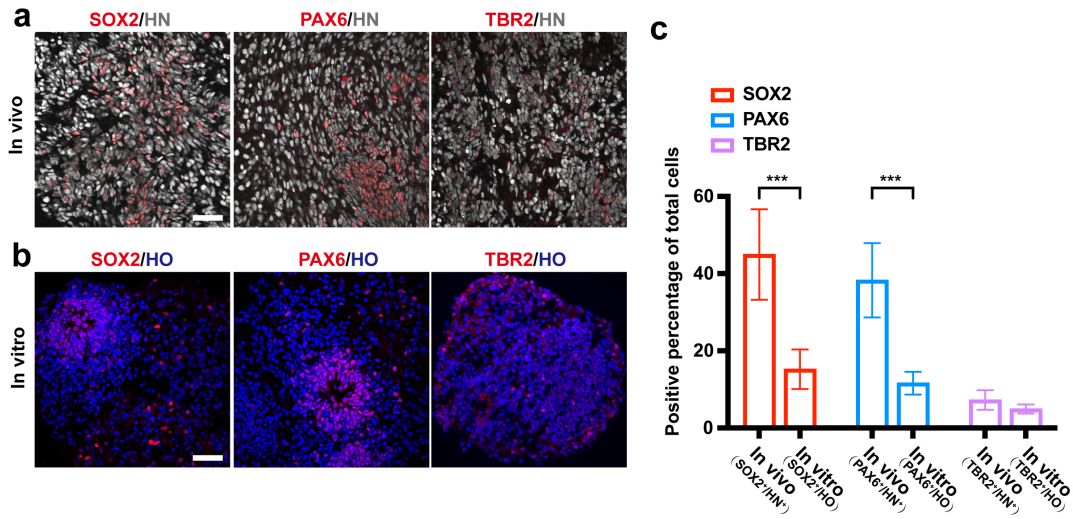

**Supplementary Figure 5. Comparison of cell comparison of cortical organoids cultured in vitro for 95 days with cultured in vitro for 50 days and then transplanted into brain for 45 days.**

(a-b) Representative images showing the neuronal progenitor markers SOX2, dorsal forebrain progenitor marker PAX6, and intermediate progenitor marker TBR2 in the organoids cultured in vitro for 50 days and then transplanted into brain for 45 days (a) or in the organoids cultured in vitro for 95 days (b). Scale bar, a-b, 50  $\mu$ m. (c) Bar graph showing cell populations of two kinds of organoids.  $n = 6$  animals for a and  $n = 18$  organoids for b. More than 10,000 cells from random fields were manually counted in each condition. In c, data were presented as mean  $\pm$  standard deviation.



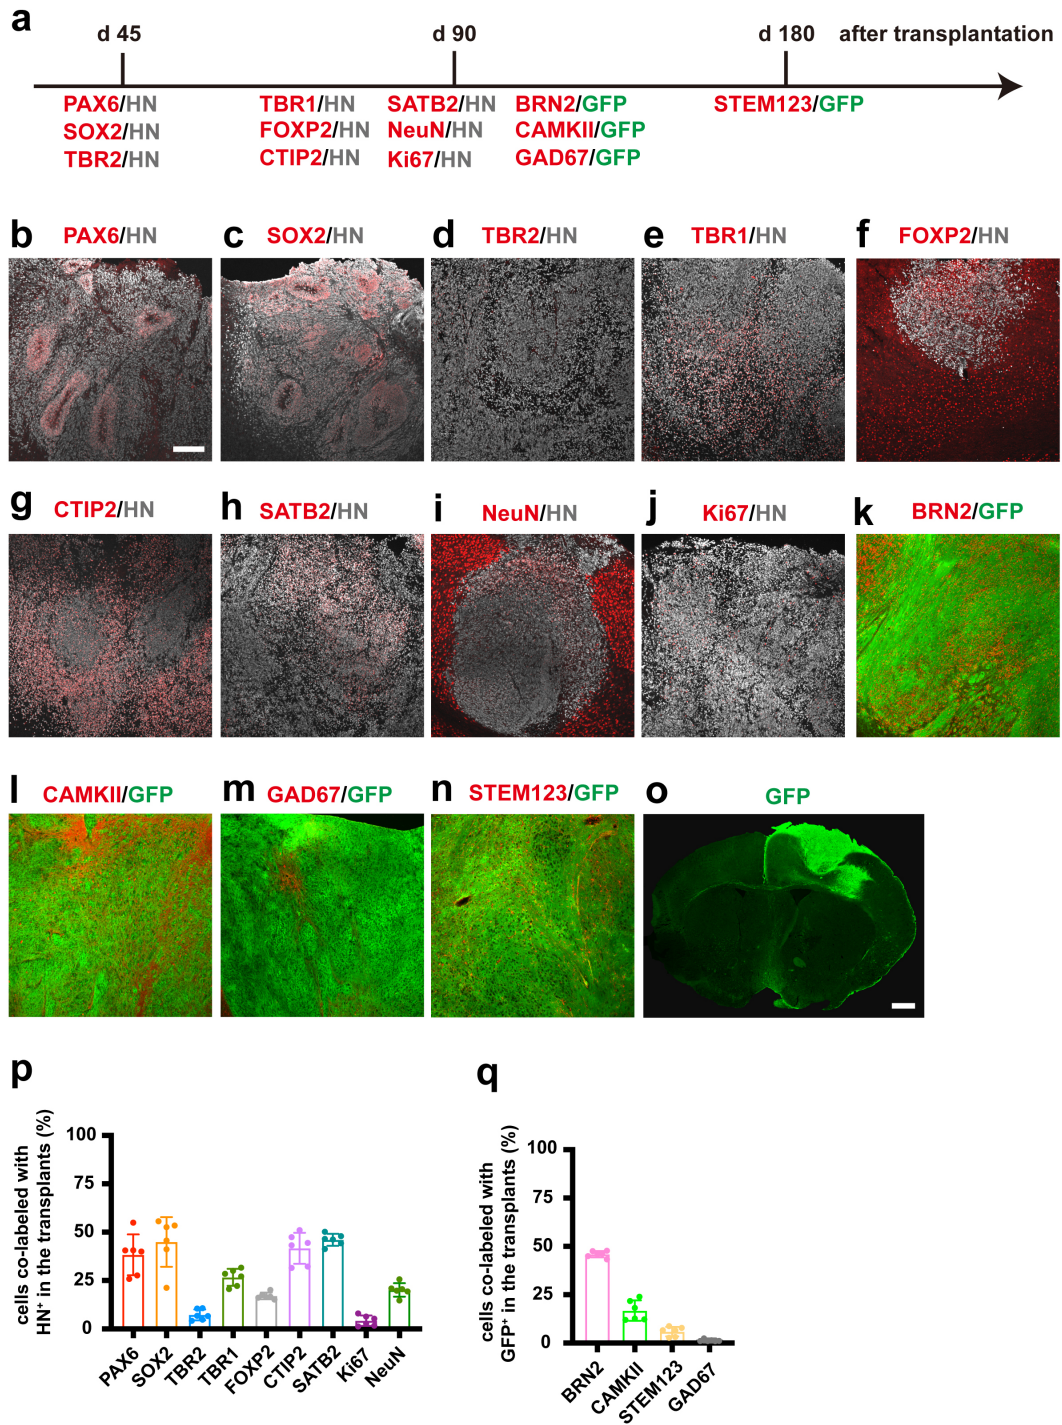

**Supplementary Figure 6. The survival and differentiation of cortical organoids after transplantation into the cortex of stroke mice.**

**(a)** Schematic showing the immunostaining timeline after hESCs-derived human cerebral

organoids transplantation. **(b-n)** Representative images showing grafts stained with dorsal forebrain progenitor marker PAX6 **(b)** neuronal progenitor markers SOX2 **(c)**, intermediate progenitor marker TBR2 **(d)**, deep-layer (V-VI) cortical marker TBR1, FOXP2 and CTIP2 and **(e-g)**, upper layers (II-IV) cortical marker SATB2 **(h)**, mature neuron marker NeuN **(i)**, cell proliferation marker Ki67 **(j)**. **(k-n)** Representative images showing GFP<sup>+</sup> transplants stained with upper layers (II-IV) cortical marker BRN2 **(k)**, pyramidal neurons marker CaMKII **(l)**, GABAergic neuron marker GAD67 **(m)** and human astrocytes marker STEM123 **(n)**. Scale bar, **b-n**, 50  $\mu\text{m}$ . **(o)** Immunostaining for GFP<sup>+</sup> graft 150 d in stroke mice transplanted with human cerebral organoids. Scale bar, 150  $\mu\text{m}$ . **(p-q)** Bar graph showing the proportion of PAX6-, SOX2-, TBR2-, TBR1-, FOXP2-, CTIP2-, SATB2-, Ki67-, NeuN- **(p)** and BRN2-, CAMKII-, STEM123-, GAD67- **(q)** positive cells after differentiation.  $n = 6$  animals. More than 10,000 cells from random fields were manually counted in each condition. In **p** and **q**, data were presented as mean  $\pm$  standard deviation.

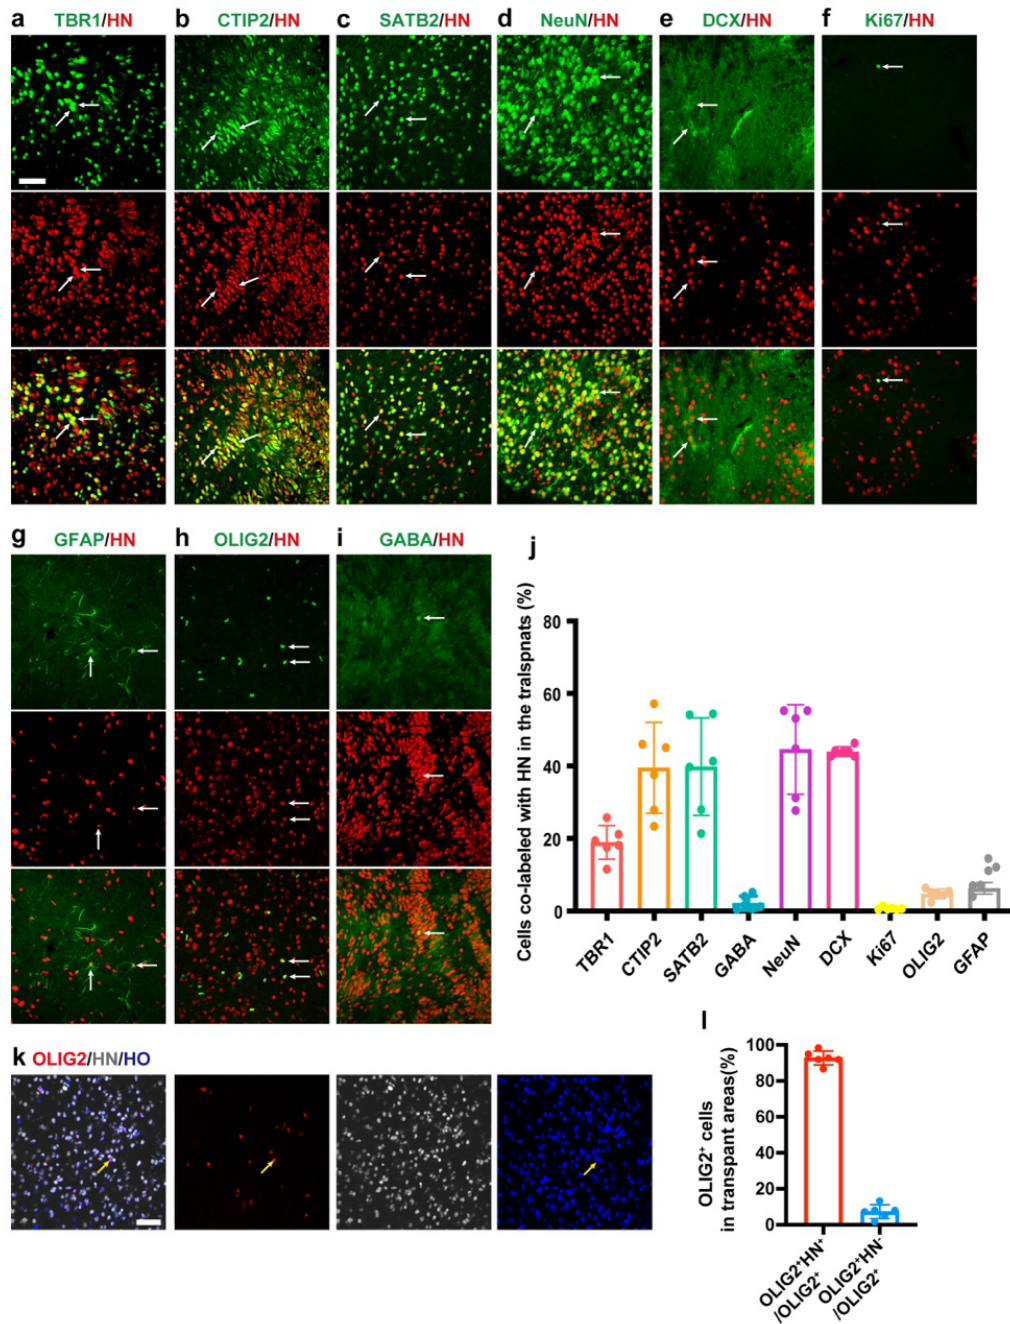

**Supplementary Figure 7. Differentiation of human cerebral organoids on d 180 after transplantation into the cortex of stroke mice.**

**(a-i)** Representative images showing deep-layer (V-VI) cortical marker TBR1 and CTIP2 **(a and b)**, upper layers (II-IV) cortical marker SATB2 **(c)**, mature neuron marker NeuN

(d), immature neuron marker DCX (e), cell proliferation marker Ki67 (f), astrocyte marker GFAP (g), oligodendrocyte marker OLIG2 (h) and GABAergic neuron marker GABA (i) in the grafted human cerebral organoids (HN<sup>+</sup> cells) 180 d after transplantation. Scale bar, a-i, 50  $\mu$ m. (j) Bar graph showing the proportion of TBR1-, CTIP2-, SATB2-, NeuN-, DCX-, Ki67-, OLIG2-, GFAP- and GABA-positive cells in the grafts 180 d after transplantation. (k) Representative images showing HN-positive and HN-negative OLIG2 cells on d 180 after transplantation. Scale bar, 50  $\mu$ m. (l) Bar graph showing the proportion of OLIG2 derived from host and grafted organoids.  $n = 6$  animals. More than 11,000 cells from random fields were manually counted in each condition. In j and l, data were presented as mean  $\pm$  standard deviation.

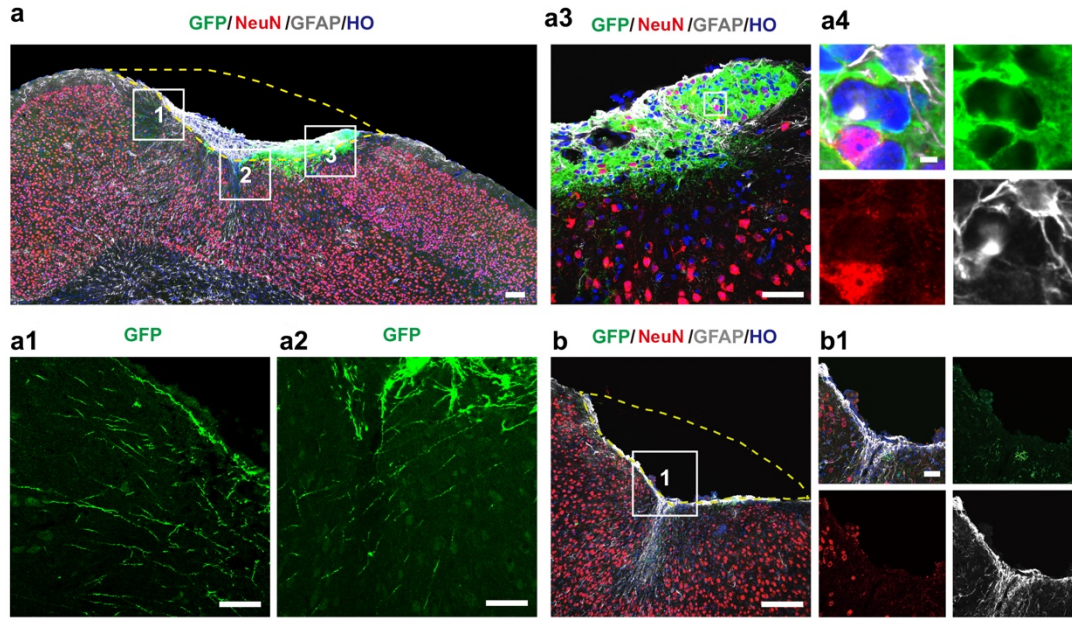

**Supplementary Figure 8. Dispersed cerebral organoids cells transplantation cannot repair infarcted tissue on d 150 after transplantation.**

Imaging showing the survival of dispersed organoids cells after transplantation into the junction area between the infarct core and peri-infarct zone in **(a)** animal A and **(b)** animal B on d 180 after transplantation (scale bar, 200  $\mu\text{m}$ ). a1 and a2: high-magnification images of GFP<sup>+</sup> fibers from the selected areas 1 and 2 in image a respectively (scale bar, 50  $\mu\text{m}$ ). a3: A high-magnification image from the selected area 3 in image a (scale bar, 50  $\mu\text{m}$ ). a4: High-magnification images from the selected area in image a3 (scale bar, 5  $\mu\text{m}$ ). b1: High-magnification images from the selected area in image b (scale bar, 50  $\mu\text{m}$ ).

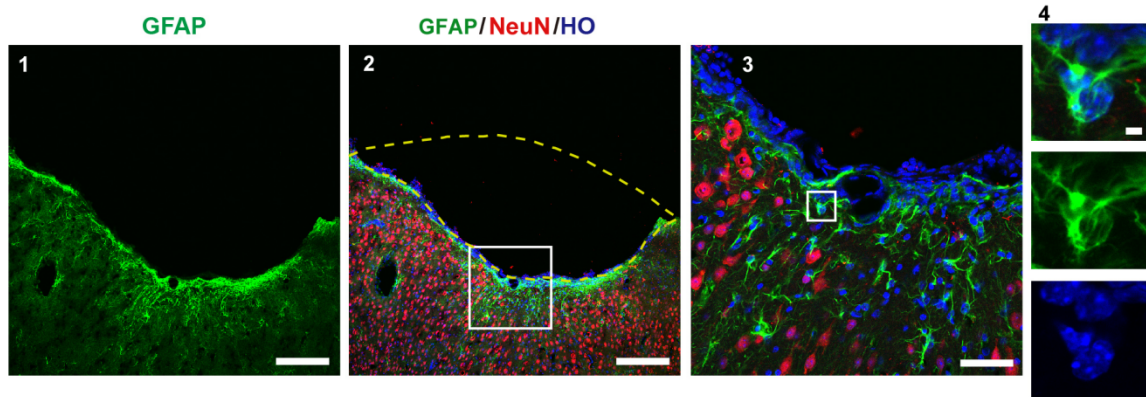

**Supplementary Figure 9. Permanent loss of brain tissue within the infarct core on d 180 after stroke.**

1: Image showing glial scar at the border of the infarct (scale bar, 200  $\mu\text{m}$ ). 2: Image showing infarcted cavity (scale bar, 200  $\mu\text{m}$ ). 3: High-magnification image from the selected area in image 2 (scale bar, 50  $\mu\text{m}$ ). 4: High-magnification images from the selected area in image 3 (scale bar, 5  $\mu\text{m}$ ).

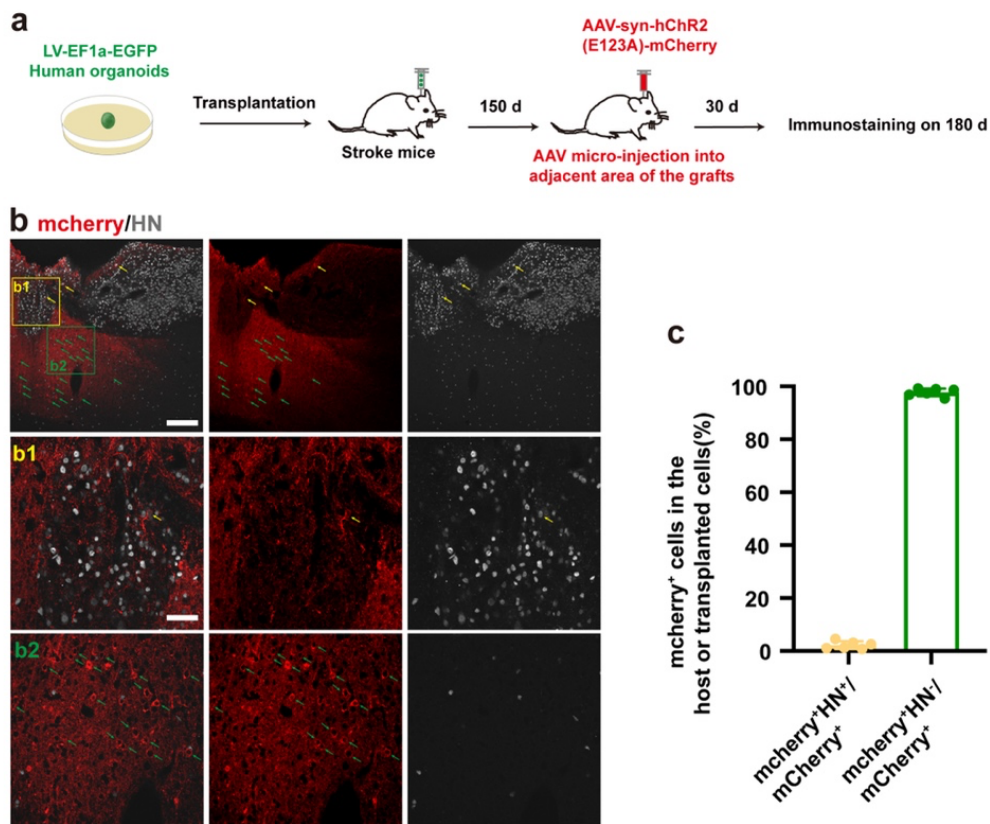

**Supplementary Figure 10. Immunostaining for coronal section at 30 d after AAV-syn-hChR2(E123A)-mCherry microinjection.**

(a) Schematic showing the timeline of transplantation, AAV microinjection, and immunostaining. (b) A representative image showing mCherry<sup>+</sup> cells co-labeled with HN (yellow arrow) or not co-labeled with HN (green arrow). The yellow and green boxed areas in b were shown in high magnification in b1 and b2 respectively. scale bar, 200  $\mu$ m (b) and 50  $\mu$ m (b1, b2). (c) Bar graph showing the proportion of mCherry<sup>+</sup> cells derived from host (HN-negative) and grafted organoids (HN-positive), data were presented as mean  $\pm$  standard deviation.

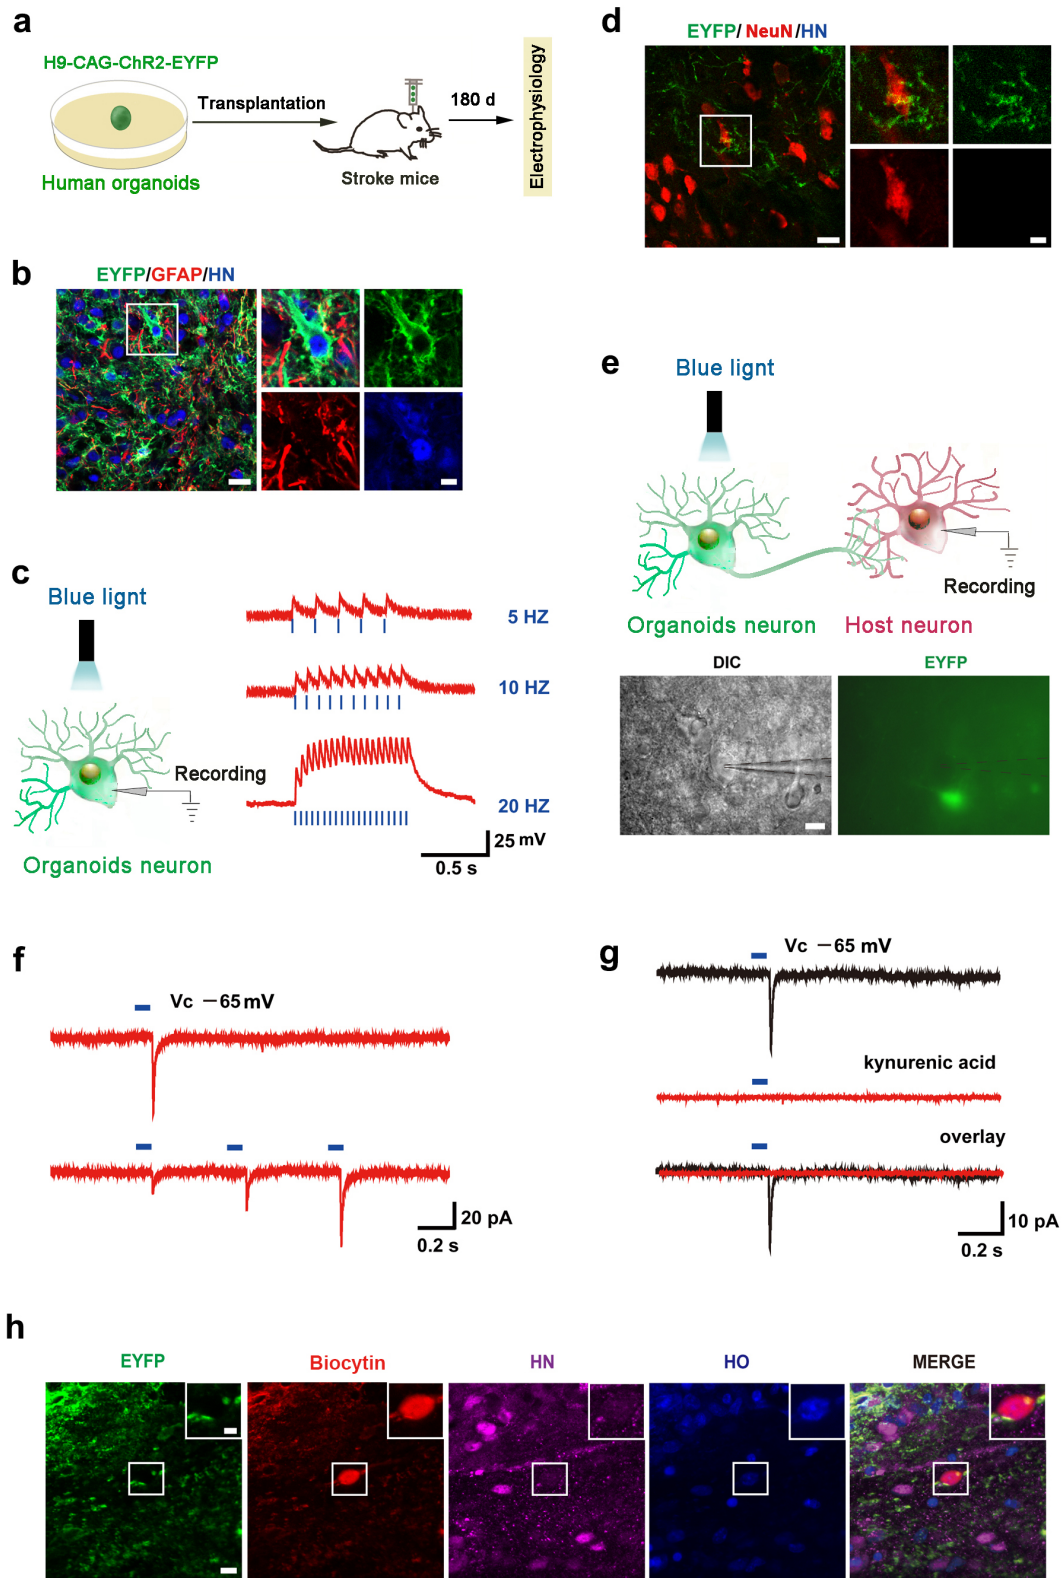



**Supplementary Figure 11. Host neurons receive synaptic input from the grafted organoids neurons.**

(a) Design of the experiments for **b-h**. Human cerebral organoids were generated from H9-CAG-hChR2-EYFP cell line. (b) A representative image showing that EYFP<sup>+</sup> cells are co-labeled with HN (left, scale bar, 20  $\mu$ m) and high magnification images from a selected area in the leftward image (right, scale bar, 5  $\mu$ m). (c) Diagram (left) showing the strategy to evoke APs in the organoids neuron and APs traces (right) evoked by blue photo stimuli pulses (470 nm, 10 mW/mm<sup>2</sup>, 5 ms duration) of various frequencies on the ChR2-EYFP-expressing organoids neuron. (d) A representative image showing EYFP<sup>+</sup> fibers extending to NeuN<sup>+</sup>/HN<sup>-</sup> host neurons (left, scale bar, 20  $\mu$ m) and high magnification images from a selected area in the leftward image (right, scale bar, 5  $\mu$ m). (e) Diagram (upper) showing the strategy to test whether host neurons receive synaptic input from organoids neurons and images (lower) showing whole-cell patch-clamp recordings from host neurons (GFP<sup>-</sup>). Black dotted lines indicate the placement of the patch-clamp electrode. Scale bar, 20  $\mu$ m. (f) Representative traces of PSCs evoked by 1 or 3 blue photo stimuli pulses at a holding potential of -65 mV. (g) Representative traces of PSCs evoked by 1 blue photo stimuli pulse with or without kynurenic acid. In **f** and **g**,  $n = 19$  neurons from 6 mice, in which, 6 neurons were responsive to photostimulation. (h) Representative images showing the host neuron stained by biocytin, in which, biocytin<sup>+</sup> neuron was EYFP<sup>-</sup> and HN<sup>-</sup>negative. Biocytin was filled into the neuron through electrode after patch-clamp recording (left, scale bar, 10  $\mu$ m) and high magnification

images from a selected area in the leftward image (right, scale bar, 5  $\mu\text{m}$ ).

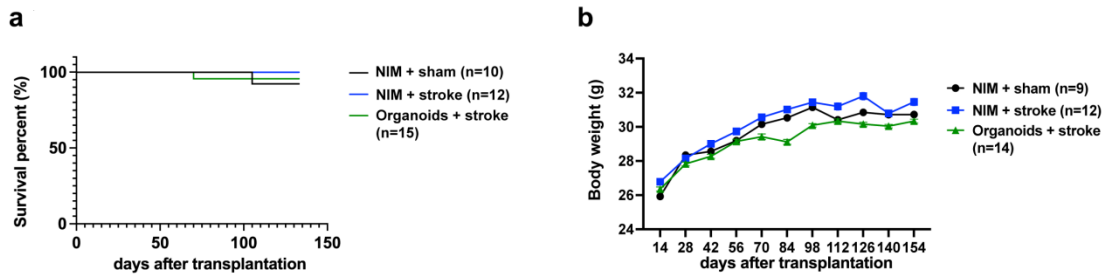

**Supplementary Figure 12. Survival percentage and body weight in NOD-SCID mice.**

**(a)** Survival percentage of NOD-SCID mice in three groups. **(b)** Body weight of NOD-SCID mice in three groups, mice were excluded when mortality occurred, data were presented as mean  $\pm$  standard deviation.

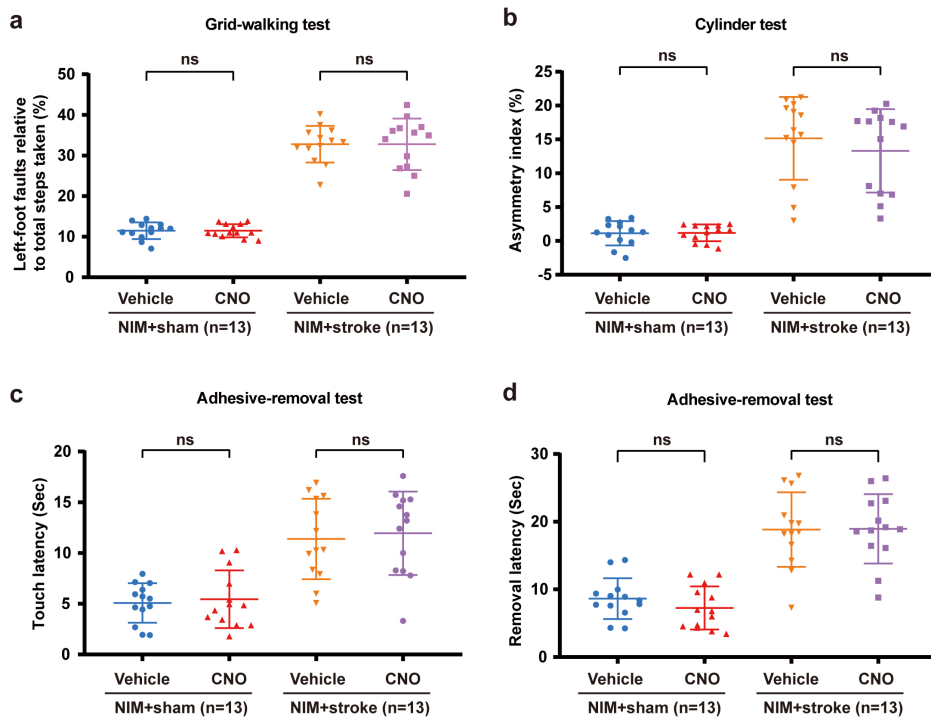

**Supplementary Figure 13. Systemic injection of CNO does not affect sensorimotor behaviors.**

**(a)** Left-foot faults relative to total steps taken in the grid-walking test (One-way ANOVA,  $F_{3,48} = 116.6$ ,  $P > 0.05$ , between groups). **(b)** Asymmetry index of forelimbs in the cylinder test (One-way ANOVA,  $F_{3,48} = 37.33$ ,  $P > 0.05$ , between groups). **(c)** Touch latency (One-way ANOVA,  $F_{3,48} = 16.08$ ,  $P > 0.05$ , between groups) in the adhesive-removal test. **(d)** Remove latency (One-way ANOVA,  $F_{3,48} = 27.62$ ,  $P > 0.05$ , between groups) in the adhesive-removal test.  $n = 13$  animals for each group. In **a-d**, data were presented as mean  $\pm$  standard deviation.

**Supplementary Table 1. Key resources table**

| REAGENT or RESOURCE                  | SOURCE                       | IDENTIFIER                           |
|--------------------------------------|------------------------------|--------------------------------------|
| <b>Antibodies</b>                    |                              |                                      |
| Mouse monoclonal anti-BRN2           | Santa Cruz<br>Biotechnology  | Cat# sc-393324;<br>RRID: AB_2737347  |
| Mouse monoclonal anti-CAMKII         | Cell Signaling<br>Technology | Cat# 50049<br>RRID: AB_2721906       |
| Rat monoclonal anti-CTIP2            | Abcam                        | Cat# ab18465;<br>RRID: AB_2064130    |
| Rabbit polyclonal anti-DCX           | Cell Signaling<br>Technology | Cat# 4604;<br>RRID: AB_561007        |
| Rabbit polyclonal anti-FOXP2         | Abcam                        | Cat# ab16046;<br>RRID: AB_2107107    |
| Rabbit polyclonal anti-FOXP1         | Abcam                        | Cat# ab18259;<br>RRID: AB_732415     |
| Rabbit polyclonal anti-GABA          | Sigma-Aldrich                | Cat# A2052;<br>RRID: AB_477652       |
| Mouse monoclonal anti-GAD67          | Merck                        | Cat# MAB5406;<br>RRID: AB_2278725    |
| Rabbit polyclonal anti-GFAP          | Agilent                      | Cat# Z0334;<br>RRID: AB_10013382     |
| Rabbit polyclonal anti-GFP           | Millipore                    | Cat# AB3080P;<br>RRID: AB_2630379    |
| Chicken polyclonal anti-GFP          | Millipore                    | Cat# AB16901;<br>RRID: AB_90890      |
| Rabbit polyclonal anti-GLUTAMATE     | Sigma-Aldrich                | Cat# G6642;<br>RRID: AB_259946       |
| Mouse monoclonal anti-Human Nuclei   | Millipore                    | Cat# MAB1281;<br>RRID: AB_94090      |
| Rabbit polyclonal anti-HOPX          | Sigma-Aldrich                | Cat# HPA030180;<br>RRID: AB_10603770 |
| Rabbit polyclonal anti-Ki67          | Thermo Fisher<br>Scientific  | Cat# PA5-19462;<br>RRID: AB_10981523 |
| Mouse monoclonal anti-MAP2           | Sigma-Aldrich                | Cat# M1406;<br>RRID: AB_477171       |
| Rabbit polyclonal anti-NeuN          | Millipore                    | Cat# ABN78;<br>RRID: AB_10807945     |
| Mouse monoclonal anti-NeuN           | Millipore                    | Cat# MAB377;<br>RRID: AB_2298772     |
| Goat polyclonal anti-Nestin          | Santa Cruz<br>Biotechnology  | Cat# sc-21247;<br>RRID: AB_650014    |
| Mouse monoclonal anti-Human NCAM     | Santa Cruz<br>Biotechnology  | Cat# sc-106;<br>RRID: AB_627128      |
| Rabbit polyclonal anti-PAX6          | Covance                      | Cat# PRB-278P;<br>RRID: AB_291612    |
| Mouse monoclonal anti-PKC- $\lambda$ | BD Biosciences               | Cat# 610207;<br>RRID: AB_397606      |
| Mouse monoclonal anti-Human SATB2    | Abcam                        | Cat# ab51502;<br>RRID: AB_882455     |

|                                                                                        |                          |                                        |
|----------------------------------------------------------------------------------------|--------------------------|----------------------------------------|
| Rabbit monoclonal anti-SATB2                                                           | Abcam                    | Cat# ab92446;<br>RRID: AB_10563678     |
| Goat polyclonal anti-Human SOX2                                                        | R and D Systems          | Cat# AF2018;<br>RRID: AB_355110        |
| Mouse monoclonal anti-STEM121                                                          | Takara Bio               | Cat# AB-121-U-050;<br>RRID: AB_2632385 |
| Mouse monoclonal anti-STEM123                                                          | Takara Bio               | Cat# Y40420;<br>RRID: AB_2833249       |
| Mouse monoclonal anti-Synaptophysin                                                    | Thermo Fisher Scientific | Cat# 14-6525-80;<br>RRID: AB_10670424  |
| Rabbit polyclonal anti-TBR1                                                            | Abcam                    | Cat# ab31940; RRID: AB_2200219         |
| Rabbit polyclonal anti-TBR2                                                            | Abcam                    | Cat# ab23345;<br>RRID: AB_778267       |
| Mouse monoclonal anti-Tuj-1                                                            | Sigma-Aldrich            | Cat# T8660;<br>RRID: AB_477590         |
| Rabbit polyclonal anti-Tuj-1                                                           | Covance                  | Cat# PRB-435P-100;<br>RRID: AB_291637  |
| Donkey anti-Mouse IgG (H+L) Highly Cross-Adsorbed Secondary Antibody, Alexa Fluor 488  | Thermo Fisher Scientific | Cat# A-21202;<br>RRID: AB_141607       |
| Donkey anti-Rabbit IgG (H+L) Highly Cross-Adsorbed Secondary Antibody, Alexa Fluor 488 | Thermo Fisher Scientific | Cat# A-21206;<br>RRID: AB_2535792      |
| Donkey anti-Goat IgG (H+L) Highly Cross-Adsorbed Secondary Antibody, Alexa Fluor 488   | Thermo Fisher Scientific | Cat# A-11055;<br>RRID: AB_2534102      |
| Goat anti-Chicken IgY (H+L) Highly Cross-Adsorbed Secondary Antibody, Alexa Fluor 488  | Thermo Fisher Scientific | Cat# A-11039;<br>RRID: AB_2534096      |
| Donkey anti-Mouse IgG (H+L) Highly Cross-Adsorbed Secondary Antibody, Alexa Fluor 546  | Thermo Fisher Scientific | Cat# A10036;<br>RRID: AB_2534012       |
| Donkey anti-Rabbit IgG (H+L) Highly Cross-Adsorbed Secondary Antibody, Alexa Fluor 546 | Thermo Fisher Scientific | Cat# A10040;<br>RRID: AB_2534016       |
| Donkey anti-Rat IgG (H+L) Highly Cross-Adsorbed Secondary Antibody, Alexa Fluor 594    | Thermo Fisher Scientific | Cat# A-21209;<br>RRID: AB_2535795      |
| Donkey anti-Goat IgG (H+L) Highly Cross-Adsorbed Secondary Antibody, Alexa Fluor 546   | Thermo Fisher Scientific | Cat# A-11056;<br>RRID: AB_142628       |

|                                                                                       |                           |                                  |
|---------------------------------------------------------------------------------------|---------------------------|----------------------------------|
| Donkey anti-Mouse IgG (H+L) Highly Cross-Adsorbed Secondary Antibody, Alexa Fluor 647 | Thermo Fisher Scientific  | Cat# A-31571;<br>RRID: AB_162542 |
| Goat anti-Chicken IgG (H+L) Highly Cross-Adsorbed Secondary Antibody, Alexa Fluor 647 | Thermo Fisher Scientific  | Cat# A21449;<br>RRID: AB_1500594 |
| Hoechst 33342                                                                         | Cell Signaling Technology | Cat# 4082;<br>RRID: AB_10626776  |
| <b>Bacterial and Virus Strains</b>                                                    |                           |                                  |
| AAV-syn-hChr2(E123A)-mCherry                                                          | GeneChem                  | N/A                              |
| rLV-EF1a-hM4D(Gi)-mCherry-WRPE                                                        | BrainVTA                  | Cat# LV-0378                     |
| LV-EF1a-EGFP                                                                          | Nantong Gadgetzan         | N/A                              |
| <b>Chemicals, Peptides, and Recombinant Proteins</b>                                  |                           |                                  |
| B27 Supplement                                                                        | Life Technologies         | Cat# 17504044                    |
| Biocytin                                                                              | Sigma-Aldrich             | Cat# 576-19-2                    |
| Choline chloride                                                                      | Sigma-Aldrich             | Cat# C7527-100G                  |
| Cesium-gluconate                                                                      | Hello-bio                 | Cat# HB4822                      |
| CsCl                                                                                  | Sigma-Aldrich             | Cat# 7647-17-8                   |
| Donkey Serum                                                                          | Milipore                  | Cat# S30-KC                      |
| Dispase                                                                               | Gibco                     | Cat# 17105041                    |
| DMEM/F12                                                                              | Life Technologies         | Cat# C11330                      |
| DMH-1                                                                                 | Tocris                    | Cat# 4126                        |
| DMSO                                                                                  | Sigma-Aldrich             | Cat# D8418                       |
| Essential 8 Basal medium                                                              | Life Technologies         | Cat# A14666SA                    |
| Essential 8 Supplement                                                                | Life Technologies         | Cat# A1517001                    |
| EDTA                                                                                  | Lonza                     | Cat# 17-711E                     |
| EGTA                                                                                  | Tocris                    | Cat# 2807                        |
| FBS                                                                                   | Life Technologies         | Cat# 0099-141                    |
| Glucose                                                                               | Diamond                   | Cat# A1001880500                 |
| HEPES                                                                                 | BBI Lifescience           | Cat# A600264-0250                |
| Kynurenic acid                                                                        | Tocris                    | Cat# 223                         |

|                                               |                               |                                                                                                                                     |
|-----------------------------------------------|-------------------------------|-------------------------------------------------------------------------------------------------------------------------------------|
| K-Gluconate                                   | Sigma-Aldrich                 | Cat# G4500                                                                                                                          |
| Mg-ATP                                        | Sigma-Aldrich                 | Cat# 74804-12-9                                                                                                                     |
| Na-ATP                                        | Sigma-Aldrich                 | Cat# A6419                                                                                                                          |
| Na <sub>2</sub> -ATP                          | Sigma-Aldrich                 | Cat# 34369-07-8                                                                                                                     |
| NaHCO <sub>3</sub>                            | BBI Life Science              | Cat# A610482-0500                                                                                                                   |
| Non-essential amino acids solution (NEAA)     | Gibco                         | Cat# 11140                                                                                                                          |
| N <sub>2</sub>                                | Gibco                         | Cat# 17105041                                                                                                                       |
| PBS tablets                                   | Medicago                      | Cat# 09-9400-100                                                                                                                    |
| QX-314                                        | Tocris                        | Cat# 2313                                                                                                                           |
| Rose Bengal                                   | Sigma-Aldrich                 | Cat# 330000-5G                                                                                                                      |
| Rock inhibitor                                | Stem cell                     | Cat# 72304                                                                                                                          |
| SB431542                                      | Tocris                        | Cat# 1614                                                                                                                           |
| Sodium-L-ascorbate                            | Sigma-Aldrich                 | Cat# A7631-25G                                                                                                                      |
| Sodium-Pyruvate                               | Sigma-Aldrich                 | Cat# P5280-25G                                                                                                                      |
| Sucrose                                       | BIOFROXX                      | Cat# 1245GR500                                                                                                                      |
| TrypLE                                        | Thermo Fisher Scientific      | Cat# 12604013                                                                                                                       |
| 2% 2,3,5-triphenyl tetrazolium chloride (TTC) | Sigma-Aldrich                 | Cat# T8877                                                                                                                          |
| Vitronectin                                   | Life Technologies             | Cat# A14700                                                                                                                         |
| <b>Experimental Models: Cell Lines</b>        |                               |                                                                                                                                     |
| H9 CAG-ChR2-EYFP                              | A gift from Dr. Su-Chun Zhang | N/A                                                                                                                                 |
| hESCs (line H9)                               | WiCell                        | Cat# 16-W0060                                                                                                                       |
| hiPSCs (IMR90-4)                              | WiCell                        | Cat# 17-W0063                                                                                                                       |
| <b>Experimental Models: Organisms/Strains</b> |                               |                                                                                                                                     |
| Mouse: NOD-Prkdcem26Cd52/Gpt (NOD-SCID)       | GemPharmatech                 | Cat# T001492;                                                                                                                       |
| <b>Software and Algorithms</b>                |                               |                                                                                                                                     |
| Adobe Illustrator CS6                         | Adobe Systems                 | <a href="https://www.adobe.com/products/illustrator.html">https://www.adobe.com/products/illustrator.html</a> ;<br>RRID: SCR_010279 |



|                                 |                                |                                                                                                                                  |
|---------------------------------|--------------------------------|----------------------------------------------------------------------------------------------------------------------------------|
| Adobe Photoshop CS6             | Adobe Systems                  | <a href="https://www.adobe.com">https://www.adobe.com</a> ;<br>RRID: SCR_014199                                                  |
| GraphPad Prism 7 software       | GraphPad                       | <a href="https://www.graphpad.com">https://www.graphpad.com</a> ;<br>RRID: SCR_002798                                            |
| IBM SPSS Statistics 22 software | IBM<br>SPSS Statistics         | <a href="https://www.ibm.com/products/spss-statistics">https://www.ibm.com/products/<br/>spss-statistics</a><br>RRID: SCR_019096 |
| ImageJ                          | ImageJ                         | <a href="https://imagej.nih.gov/ij">https://imagej.nih.gov/ij</a> ;<br>RRID: SCR_003070                                          |
| Mini Analysis Program 6.0       | Synaptosoft, Inc.              | <a href="http://www.synaptosoft.com/MiniAnalysis">http://www.synaptosoft.com/Mi-<br/>niAnalysis</a> ;<br>RRID: SCR_002184        |
| pClamp 10                       | Molecular<br>Devices           | <a href="http://mdc.custhelp.com">http://mdc.custhelp.com</a> ;<br>RRID: SCR_011323                                              |
| ZEN2009 Light Edition           | Carl Zeiss                     | <a href="https://www.zeiss.com">https://www.zeiss.com</a> ;<br>RRID: SCR_013672                                                  |
| <b>Other</b>                    |                                |                                                                                                                                  |
| borosilicate Glass              | Sutter Instrument              | Cat# BF150-86-10                                                                                                                 |
| borosilicate Glass Capillaries  | World Precision<br>Instruments | Cat# TW100-4                                                                                                                     |

**Supplementary Table 2. Summary table showing the replicates number of organoids and mice used for immunostaining, behavioral, and electrophysiological experiments**

| <b>Experiment</b>                     | <b>Figure number</b>     | <b>Group</b>                            | <b>Replicates number</b> | <b>Organoids origin</b> |
|---------------------------------------|--------------------------|-----------------------------------------|--------------------------|-------------------------|
| Assessment of infarct area            | Supplementary Fig. 2a-b  | PT-1                                    | mice number, $n=10$      | N/A                     |
|                                       |                          | PT-2                                    |                          |                         |
| Behavioral test                       | Fig. 5a-d                | NIM + sham                              | mice number, $n=9$       | N/A                     |
|                                       |                          | NIM + stroke                            | mice number, $n=12$      |                         |
|                                       |                          | Organoids + stroke                      | mice number, $n=14$      | hESCs (line H9)         |
|                                       | Fig. 5h-k                | Sham treated with vehicle               | mice number, $n=9$       | N/A                     |
|                                       |                          | Stroke treated with vehicle             | mice number, $n=12$      |                         |
|                                       |                          | Organoids + stroke treated with vehicle | mice number, $n=14$      | hiPSCs (IMR-90-4)       |
|                                       |                          | Organoids + stroke treated with CNO     | mice number, $n=14$      |                         |
|                                       | Supplementary Fig. 2c-f  | Sham                                    | mice number, $n=10$      | N/A                     |
|                                       |                          | PT-1                                    |                          | N/A                     |
|                                       |                          | PT-2                                    |                          | N/A                     |
|                                       | Supplementary Fig. 13a-d | NIM + sham treated with vehicle         | mice number, $n=13$      | N/A                     |
|                                       |                          | NIM + sham treated with CNO             |                          | N/A                     |
|                                       |                          | NIM + stroke treated with vehicle       |                          | N/A                     |
|                                       |                          | NIM + stroke treated with CNO           |                          | N/A                     |
| Immunostaining for organoids in vitro | Supplementary Fig. 3a-h  | FOXG1 <sup>+</sup> /HO                  | Organoids, $n=18$        | hESCs (line H9)         |
|                                       |                          | Tuj-1 <sup>+</sup> /HO                  |                          |                         |
|                                       |                          | PAX6 <sup>+</sup> /HO                   |                          |                         |
|                                       |                          | TBR1 <sup>+</sup> /HO                   |                          |                         |
|                                       |                          | CTIP2 <sup>+</sup> /HO                  |                          |                         |
|                                       |                          | GAD67 <sup>+</sup> /HO                  |                          |                         |
|                                       |                          | Ki67 <sup>+</sup> /HO                   |                          |                         |

|                                               |                            |                                                       |                             |                      |
|-----------------------------------------------|----------------------------|-------------------------------------------------------|-----------------------------|----------------------|
|                                               |                            | NeuN <sup>+</sup> /HO                                 |                             |                      |
|                                               | Supplementary<br>Fig. 3k-n | FOXP2 <sup>+</sup> /HO                                | Organoids,<br><i>n</i> =10  | hiPSCs<br>(IMR-90-4) |
|                                               |                            | PAX6 <sup>+</sup> /HO                                 |                             |                      |
|                                               |                            | TBR1 <sup>+</sup> /HO                                 |                             |                      |
|                                               |                            | CTIP2 <sup>+</sup> /HO                                |                             |                      |
|                                               | Supplementary<br>Fig. 5b   | SOX2 <sup>+</sup> /HO                                 | Organoids,<br><i>n</i> =18  | hESCs<br>(line H9)   |
|                                               |                            | PAX6 <sup>+</sup> /HO                                 |                             |                      |
|                                               |                            | TBR2 <sup>+</sup> /HO                                 |                             |                      |
| Immunostaining<br>for<br>organoids in<br>vivo | Fig. 2f-h                  | HN <sup>+</sup> /HO                                   | brain slices<br>from 6 mice | hESCs<br>(line H9)   |
|                                               |                            | NeuN <sup>+</sup> /HO                                 |                             |                      |
|                                               |                            | GFAP <sup>+</sup> /HO                                 |                             |                      |
|                                               |                            | NeuN <sup>+</sup> HN <sup>+</sup> /NeuN <sup>+</sup>  |                             |                      |
|                                               |                            | NeuN <sup>+</sup> HN <sup>-</sup> /NeuN <sup>+</sup>  |                             |                      |
|                                               |                            | GFAP <sup>+</sup> HN <sup>+</sup> /GFAP <sup>+</sup>  |                             |                      |
|                                               |                            | GFAP <sup>+</sup> HN <sup>-</sup> /GFAP <sup>+</sup>  |                             |                      |
|                                               | Fig. 5f                    | mCherry <sup>+</sup> HN <sup>+</sup> /HN <sup>+</sup> |                             | hiPSCs<br>(IMR-90-4) |
|                                               | Supplementary<br>Fig. 5a   | SOX2 <sup>+</sup> /HN <sup>+</sup>                    |                             | hESCs<br>(line H9)   |
|                                               |                            | PAX6 <sup>+</sup> /HN <sup>+</sup>                    |                             |                      |
|                                               |                            | TBR2 <sup>+</sup> /HN <sup>+</sup>                    |                             |                      |
|                                               | Supplementary<br>Fig. 6    | SOX2 <sup>+</sup> /HN <sup>+</sup>                    |                             |                      |
|                                               |                            | PAX6 <sup>+</sup> /HN <sup>+</sup>                    |                             |                      |
|                                               |                            | TBR2 <sup>+</sup> /HN <sup>+</sup>                    |                             |                      |
|                                               |                            | TBR1 <sup>+</sup> /HN <sup>+</sup>                    |                             |                      |
|                                               |                            | FOXP2 <sup>+</sup> /HN <sup>+</sup>                   |                             |                      |
|                                               |                            | CTIP2 <sup>+</sup> /HN <sup>+</sup>                   |                             |                      |
|                                               |                            | SATB2 <sup>+</sup> /HN <sup>+</sup>                   |                             |                      |
|                                               |                            | Ki67 <sup>+</sup> /HN <sup>+</sup>                    |                             |                      |
|                                               |                            | NeuN <sup>+</sup> /HN <sup>+</sup>                    |                             |                      |
|                                               |                            | BRN2 <sup>+</sup> /GFP <sup>+</sup>                   |                             |                      |
|                                               |                            | CAMKII <sup>+</sup> /GFP <sup>+</sup>                 |                             |                      |
|                                               |                            | STEM123 <sup>+</sup> /GFP <sup>+</sup>                |                             |                      |
|                                               |                            | GAD67 <sup>+</sup> /GFP <sup>+</sup>                  |                             |                      |
|                                               | Supplementary<br>Fig. 7    | TBR1 <sup>+</sup> /HN <sup>+</sup>                    |                             |                      |
|                                               |                            | CTIP2 <sup>+</sup> /HN <sup>+</sup>                   |                             |                      |
|                                               |                            | SATB2 <sup>+</sup> /HN <sup>+</sup>                   |                             |                      |
| NeuN <sup>+</sup> /HN <sup>+</sup>            |                            |                                                       |                             |                      |
| DCX <sup>+</sup> /HN <sup>+</sup>             |                            |                                                       |                             |                      |

|                   |                        |                                                               |                                                                                             |                          |
|-------------------|------------------------|---------------------------------------------------------------|---------------------------------------------------------------------------------------------|--------------------------|
|                   |                        | Ki67 <sup>+</sup> /HN <sup>+</sup>                            |                                                                                             |                          |
|                   |                        | GFAP <sup>+</sup> /HN <sup>+</sup>                            |                                                                                             |                          |
|                   |                        | OLIG2 <sup>+</sup> /HN <sup>+</sup>                           |                                                                                             |                          |
|                   |                        | GABA <sup>+</sup> /HN <sup>+</sup>                            |                                                                                             |                          |
|                   |                        | OLIG2 <sup>+</sup> HN <sup>+</sup> /OLIG2 <sup>+</sup>        |                                                                                             |                          |
|                   |                        | OLIG2 <sup>+</sup> HN <sup>-</sup> /OLIG2 <sup>+</sup>        |                                                                                             |                          |
|                   | Supplementary Fig. 10  | mCherry <sup>+</sup> HN <sup>+</sup><br>/mCherry <sup>+</sup> |                                                                                             | hiPSCs (IMR-90-4)        |
|                   |                        | mCherry <sup>+</sup> HN <sup>-</sup><br>/mCherry <sup>+</sup> |                                                                                             |                          |
| Survival percent  | Supplementary Fig. 12a | NIM + sham                                                    | mice number, <i>n</i> =10                                                                   | N/A                      |
|                   |                        | NIM + stroke                                                  | mice number, <i>n</i> =12                                                                   | N/A                      |
|                   |                        | Organoids + stroke                                            | mice number, <i>n</i> =15                                                                   | hESCs (line H9)          |
| Body weight       | Supplementary Fig. 12b | NIM + sham                                                    | mice number, <i>n</i> =9                                                                    | N/A                      |
|                   |                        | NIM + stroke                                                  | mice number, <i>n</i> =12                                                                   | N/A                      |
|                   |                        | Organoids + stroke                                            | mice number, <i>n</i> =14                                                                   | hESCs (line H9)          |
| Electrophysiology | Fig. 2l                | Number of APs evoked                                          | <i>n</i> = 13 neurons from 5 mice                                                           | hESCs (line H9)          |
|                   | Fig. 2m                | sPSCs                                                         | <i>n</i> = 34 neurons from 7 mice                                                           |                          |
|                   | Fig. 4f                | hChR2-mCherry mediated sPSCs recordings                       | <i>n</i> = 13 neurons from 5 mice, 6 recorded neurons were responsive to photo-stimulation. |                          |
|                   | Fig. 4g                |                                                               |                                                                                             |                          |
|                   | Fig. 4i                | LFP (contralateral motor cortex)                              | <i>n</i> = 7 slices from 3 animals                                                          | hESCs (H9-CAG-ChR2-EYFP) |
|                   | Fig. 4j                | LFP (ipsilateral striatum)                                    | <i>n</i> = 6 slices from 3 animals                                                          |                          |
|                   | Supplementary Fig. 11f | ChR2-EYFP mediated sPSCs recordings                           | <i>n</i> = 19 neurons from 6 mice, 6 neurons were responsive to photo-stimulation.          |                          |
|                   | Supplementary Fig. 11g |                                                               |                                                                                             |                          |
